# Supplementary material for: Targeting of MCL-1 in breast cancer-associated fibroblasts reverses their myofibroblastic phenotype and pro-invasive properties
Source: PubMed Central journal article supplement (PMC9474880; doi:10.1038/s41419-022-05214-9), 2022-09-14

Figure 5C

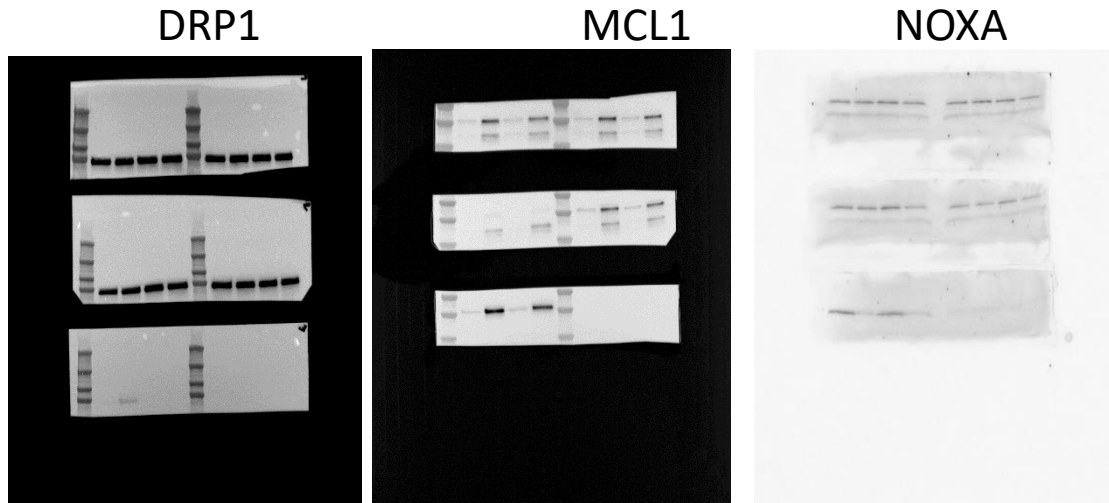

Supp Figure 1C

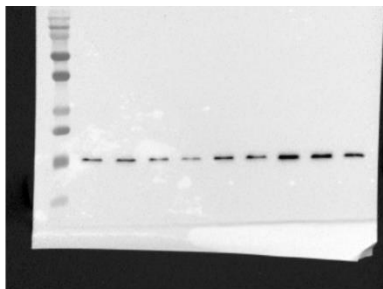

Tom20 (ab186734)

Actin

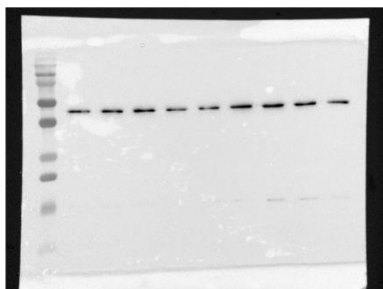

Supp Figure 1D

Mcl-1

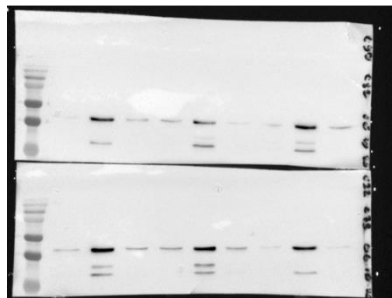

Actin

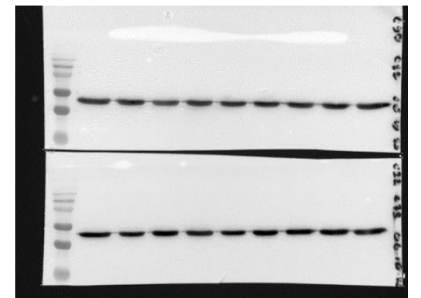

Supp Figure 2D

Bak

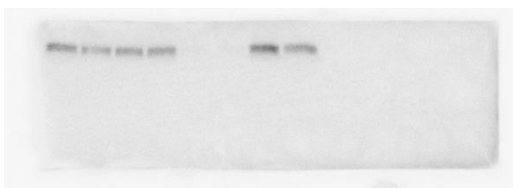

actin

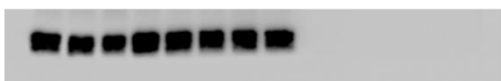

Mcl1

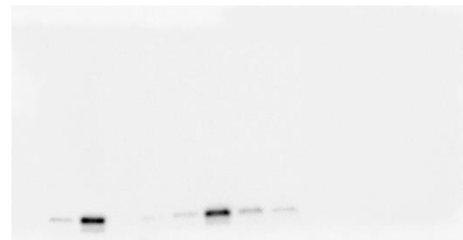

Bax

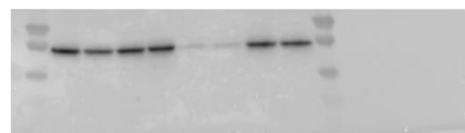

Supplement: 41419_2022_5214_MOESM7_ESM.pdf [file 41419_2022_5214_MOESM7_ESM.pdf]
